# Supplementary material for: The human metabolic profile reflects macro- and micronutrient intake distinctly according to fasting time
Source: PubMed Central journal article supplement (PMC6095860; doi:10.1038/s41598-018-30764-4), 2018-08-16
Supplement: 41598_2018_30764_MOESM1_ESM.pdf [file 41598_2018_30764_MOESM1_ESM.pdf]

**The human metabolic profile reflects macro- and micronutrient intake distinctly according to fasting time**

Sedlmeier A<sup>1,2</sup>, Kluttig A<sup>1</sup>, Giegling I<sup>3</sup>, Prehn C<sup>4</sup>, Adamski J<sup>4,5,6</sup>, Kastenmüller G<sup>6,7,8</sup>, Lacruz ME<sup>1\*</sup>

**Supplementary table 1:** Mean and SD for metabolites in the study population in  $\mu\text{mol/l}$  (n=1197)

| Variable        | Men (n=659) |       | Women (n=538) |       |
|-----------------|-------------|-------|---------------|-------|
|                 | Mean        | SD    | Mean          | SD    |
| C0              | 48.64       | 13.52 | 42.66         | 10.33 |
| C2              | 8.16        | 3.83  | 8.30          | 3.67  |
| C3              | 0.49        | 0.20  | 0.40          | 0.15  |
| C3-DC (C4-OH)   | 0.08        | 0.06  | 0.07          | 0.03  |
| C4              | 0.26        | 0.11  | 0.23          | 0.11  |
| C5              | 0.18        | 0.06  | 0.15          | 0.05  |
| C5-OH (C3-DC-M) | 0.04        | 0.01  | 0.04          | 0.01  |
| C5:1            | 0.04        | 0.01  | 0.04          | 0.01  |
| C6 (C4:1-DC)    | 0.09        | 0.03  | 0.09          | 0.03  |
| C7-DC           | 0.04        | 0.02  | 0.03          | 0.01  |
| C8              | 0.15        | 0.06  | 0.15          | 0.06  |
| C8:1            | 0.15        | 0.08  | 0.14          | 0.07  |
| C9              | 0.05        | 0.03  | 0.04          | 0.02  |
| C10             | 0.25        | 0.11  | 0.24          | 0.10  |
| C10:1           | 0.14        | 0.05  | 0.13          | 0.04  |
| C10:2           | 0.05        | 0.02  | 0.05          | 0.01  |
| C12             | 0.12        | 0.05  | 0.11          | 0.04  |
| C12:1           | 0.11        | 0.04  | 0.11          | 0.04  |
| C14:1-OH        | 0.01        | 0.00  | 0.01          | 0.00  |
| C14:2           | 0.02        | 0.01  | 0.02          | 0.01  |
| C16             | 0.14        | 0.05  | 0.12          | 0.04  |
| C16:1-OH        | 0.01        | 0.00  | 0.01          | 0.00  |
| C16:2           | 0.01        | 0.00  | 0.01          | 0.00  |
| C16:2-OH        | 0.01        | 0.00  | 0.01          | 0.00  |
| C18             | 0.06        | 0.02  | 0.05          | 0.02  |
| C18:1           | 0.14        | 0.05  | 0.13          | 0.05  |
| C18:1-OH        | 0.01        | 0.00  | 0.01          | 0.00  |
| C18:2           | 0.05        | 0.02  | 0.04          | 0.01  |

|                |        |        |        |        |
|----------------|--------|--------|--------|--------|
| Arg            | 122.93 | 22.06  | 123.05 | 22.71  |
| Gln            | 597.11 | 104.14 | 580.51 | 108.24 |
| Gly            | 242.85 | 56.21  | 287.99 | 101.35 |
| His            | 84.22  | 27.00  | 81.02  | 16.33  |
| Met            | 32.64  | 8.11   | 31.09  | 12.36  |
| Orn            | 70.82  | 19.48  | 67.79  | 18.55  |
| Phe            | 55.51  | 11.40  | 54.40  | 10.83  |
| Pro            | 246.92 | 80.30  | 216.31 | 68.74  |
| Ser            | 107.86 | 25.30  | 116.68 | 27.60  |
| Thr            | 110.84 | 30.46  | 109.15 | 30.19  |
| Trp            | 88.98  | 14.19  | 85.24  | 12.89  |
| Tyr            | 102.29 | 28.10  | 100.73 | 29.55  |
| Val            | 201.30 | 66.25  | 183.80 | 65.91  |
| xLeu           | 239.36 | 68.19  | 214.44 | 61.37  |
| lysoPC a C14:0 | 4.15   | 0.83   | 4.19   | 0.83   |
| lysoPC a C16:0 | 91.29  | 25.60  | 84.55  | 23.91  |
| lysoPC a C16:1 | 3.00   | 1.30   | 3.01   | 1.11   |
| lysoPC a C17:0 | 1.47   | 0.54   | 1.57   | 0.59   |
| lysoPC a C18:0 | 25.28  | 7.29   | 24.37  | 7.24   |
| lysoPC a C18:1 | 20.70  | 7.43   | 19.15  | 6.30   |
| lysoPC a C18:2 | 36.63  | 14.20  | 33.31  | 12.98  |
| lysoPC a C20:3 | 2.58   | 0.99   | 2.48   | 0.88   |
| lysoPC a C20:4 | 6.56   | 2.39   | 5.95   | 2.03   |
| PC aa C26:0    | 0.76   | 0.22   | 0.78   | 0.24   |
| PC aa C28:1    | 3.40   | 0.92   | 4.05   | 1.11   |
| PC aa C30:0    | 5.98   | 2.14   | 6.65   | 2.28   |
| PC aa C32:0    | 15.17  | 4.02   | 15.35  | 4.01   |
| PC aa C32:1    | 20.29  | 12.87  | 21.00  | 10.91  |
| PC aa C32:2    | 5.12   | 1.82   | 6.01   | 2.19   |
| PC aa C32:3    | 0.57   | 0.18   | 0.70   | 0.23   |
| PC aa C34:1    | 245.72 | 76.81  | 245.23 | 70.29  |
| PC aa C34:2    | 406.51 | 112.67 | 411.42 | 119.16 |

|             |        |       |        |       |
|-------------|--------|-------|--------|-------|
| PC aa C34:3 | 19.54  | 6.62  | 21.62  | 6.62  |
| PC aa C34:4 | 2.46   | 0.95  | 2.80   | 1.07  |
| PC aa C36:0 | 3.21   | 0.99  | 3.46   | 1.10  |
| PC aa C36:1 | 59.69  | 18.26 | 62.61  | 16.64 |
| PC aa C36:2 | 260.03 | 66.94 | 271.65 | 75.07 |
| PC aa C36:3 | 158.72 | 41.55 | 168.65 | 45.45 |
| PC aa C36:4 | 217.47 | 63.82 | 222.80 | 62.96 |
| PC aa C36:5 | 39.21  | 20.76 | 39.49  | 20.17 |
| PC aa C36:6 | 1.43   | 0.61  | 1.68   | 0.74  |
| PC aa C38:0 | 3.19   | 1.00  | 3.49   | 1.18  |
| PC aa C38:3 | 59.88  | 17.17 | 66.19  | 17.34 |
| PC aa C38:4 | 122.00 | 36.98 | 129.41 | 35.65 |
| PC aa C38:5 | 64.04  | 20.06 | 67.15  | 19.00 |
| PC aa C38:6 | 104.31 | 33.81 | 110.90 | 36.10 |
| PC aa C40:1 | 0.40   | 0.10  | 0.41   | 0.10  |
| PC aa C40:2 | 0.38   | 0.12  | 0.39   | 0.13  |
| PC aa C40:3 | 0.68   | 0.21  | 0.69   | 0.22  |
| PC aa C40:4 | 4.10   | 1.50  | 4.15   | 1.19  |
| PC aa C40:5 | 13.95  | 4.93  | 14.18  | 4.20  |
| PC aa C40:6 | 37.21  | 13.47 | 39.95  | 14.03 |
| PC aa C42:0 | 0.57   | 0.18  | 0.64   | 0.22  |
| PC aa C42:1 | 0.28   | 0.08  | 0.31   | 0.10  |
| PC aa C42:2 | 0.28   | 0.09  | 0.28   | 0.09  |
| PC aa C42:4 | 0.19   | 0.05  | 0.19   | 0.05  |
| PC aa C42:5 | 0.48   | 0.18  | 0.49   | 0.16  |
| PC aa C42:6 | 0.60   | 0.19  | 0.65   | 0.19  |
| PC ae C30:0 | 0.40   | 0.13  | 0.46   | 0.16  |
| PC ae C30:2 | 0.17   | 0.06  | 0.21   | 0.07  |
| PC ae C32:1 | 2.76   | 0.70  | 2.99   | 0.77  |
| PC ae C32:2 | 0.67   | 0.18  | 0.81   | 0.23  |
| PC ae C34:0 | 1.71   | 0.54  | 1.91   | 0.63  |
| PC ae C34:1 | 10.11  | 2.63  | 11.49  | 3.08  |

|               |       |      |       |      |
|---------------|-------|------|-------|------|
| PC ae C34:2   | 11.88 | 3.50 | 13.37 | 4.04 |
| PC ae C34:3   | 7.82  | 2.38 | 8.81  | 2.87 |
| PC ae C36:0   | 1.00  | 0.31 | 1.02  | 0.31 |
| PC ae C36:1   | 8.13  | 2.21 | 9.44  | 2.62 |
| PC ae C36:2   | 15.33 | 4.22 | 18.04 | 5.11 |
| PC ae C36:3   | 8.95  | 2.52 | 9.93  | 2.85 |
| PC ae C36:4   | 19.43 | 6.25 | 19.58 | 5.83 |
| PC ae C36:5   | 13.68 | 4.10 | 13.92 | 4.27 |
| PC ae C38:0   | 2.28  | 0.80 | 2.57  | 0.92 |
| PC ae C38:2   | 2.27  | 0.57 | 2.56  | 0.66 |
| PC ae C38:3   | 4.37  | 1.11 | 5.19  | 1.32 |
| PC ae C38:4   | 13.52 | 3.45 | 14.62 | 3.74 |
| PC ae C38:5   | 19.99 | 5.15 | 20.42 | 5.17 |
| PC ae C38:6   | 8.41  | 2.41 | 9.11  | 2.67 |
| PC ae C40:0   | 6.03  | 1.71 | 6.64  | 2.03 |
| PC ae C40:1   | 1.44  | 0.41 | 1.48  | 0.43 |
| PC ae C40:2   | 2.10  | 0.58 | 2.39  | 0.65 |
| PC ae C40:3   | 1.04  | 0.23 | 1.22  | 0.27 |
| PC ae C40:4   | 2.51  | 0.60 | 2.68  | 0.64 |
| PC ae C40:5   | 4.02  | 0.92 | 4.29  | 1.05 |
| PC ae C40:6   | 5.30  | 1.47 | 6.01  | 1.85 |
| PC ae C42:0   | 0.49  | 0.10 | 0.50  | 0.11 |
| PC ae C42:1   | 0.43  | 0.12 | 0.45  | 0.11 |
| PC ae C42:2   | 0.66  | 0.17 | 0.72  | 0.21 |
| PC ae C42:3   | 0.77  | 0.19 | 0.84  | 0.23 |
| PC ae C42:4   | 0.96  | 0.26 | 1.02  | 0.27 |
| PC ae C42:5   | 2.21  | 0.55 | 2.37  | 0.58 |
| PC ae C44:3   | 0.13  | 0.04 | 0.14  | 0.04 |
| PC ae C44:4   | 0.41  | 0.12 | 0.44  | 0.12 |
| PC ae C44:5   | 1.91  | 0.60 | 2.00  | 0.61 |
| PC ae C44:6   | 1.25  | 0.39 | 1.33  | 0.42 |
| SM (OH) C14:1 | 7.53  | 2.70 | 9.25  | 3.09 |

|               |         |         |         |         |
|---------------|---------|---------|---------|---------|
| SM C16:0      | 125.79  | 34.97   | 136.17  | 34.94   |
| SM C16:1      | 19.51   | 5.59    | 23.57   | 6.30    |
| SM (OH) C16:1 | 4.07    | 1.43    | 5.06    | 1.65    |
| SM C18:0      | 31.67   | 9.23    | 36.58   | 10.16   |
| SM C18:1      | 14.19   | 4.47    | 18.18   | 5.40    |
| SM (OH) C22:1 | 16.60   | 5.94    | 19.66   | 6.39    |
| SM (OH) C22:2 | 13.44   | 4.75    | 17.51   | 5.70    |
| SM C24:0      | 29.17   | 9.88    | 30.13   | 9.08    |
| SM C24:1      | 71.97   | 21.83   | 75.31   | 21.13   |
| H1            | 6411.43 | 1441.48 | 6032.16 | 1125.89 |

**Supplementary table 2:** Micro- and macronutrient intake (in g/day) for the study population (n=1197)

|                   | <b>Men (n=659)</b> |           | <b>Women (n=538)</b> |           |
|-------------------|--------------------|-----------|----------------------|-----------|
|                   | <b>Mean</b>        | <b>SD</b> | <b>Mean</b>          | <b>SD</b> |
| Alcohol           | 19.95              | 21.62     | 7.19                 | 10.22     |
| Dietary fiber     | 25.46              | 7.90      | 21.91                | 6.36      |
| Protein           | 91.04              | 24.36     | 65.07                | 18.32     |
| Fats              | 111.60             | 31.83     | 78.77                | 22.70     |
| Carbohydrates     | 272.33             | 82.80     | 215.00               | 69.80     |
| Mineral nutrients | 19.38              | 4.61      | 15.21                | 3.72      |
| Organic acids     | 7.28               | 3.19      | 7.03                 | 3.71      |
